# Supplementary material for: Ecological theory applied to environmental metabolomes reveals compositional divergence despite conserved molecular properties
Source: bioRxiv or medRxiv preprint supplement (doi:10.1101/2020.02.12.946459), 2020-02-13

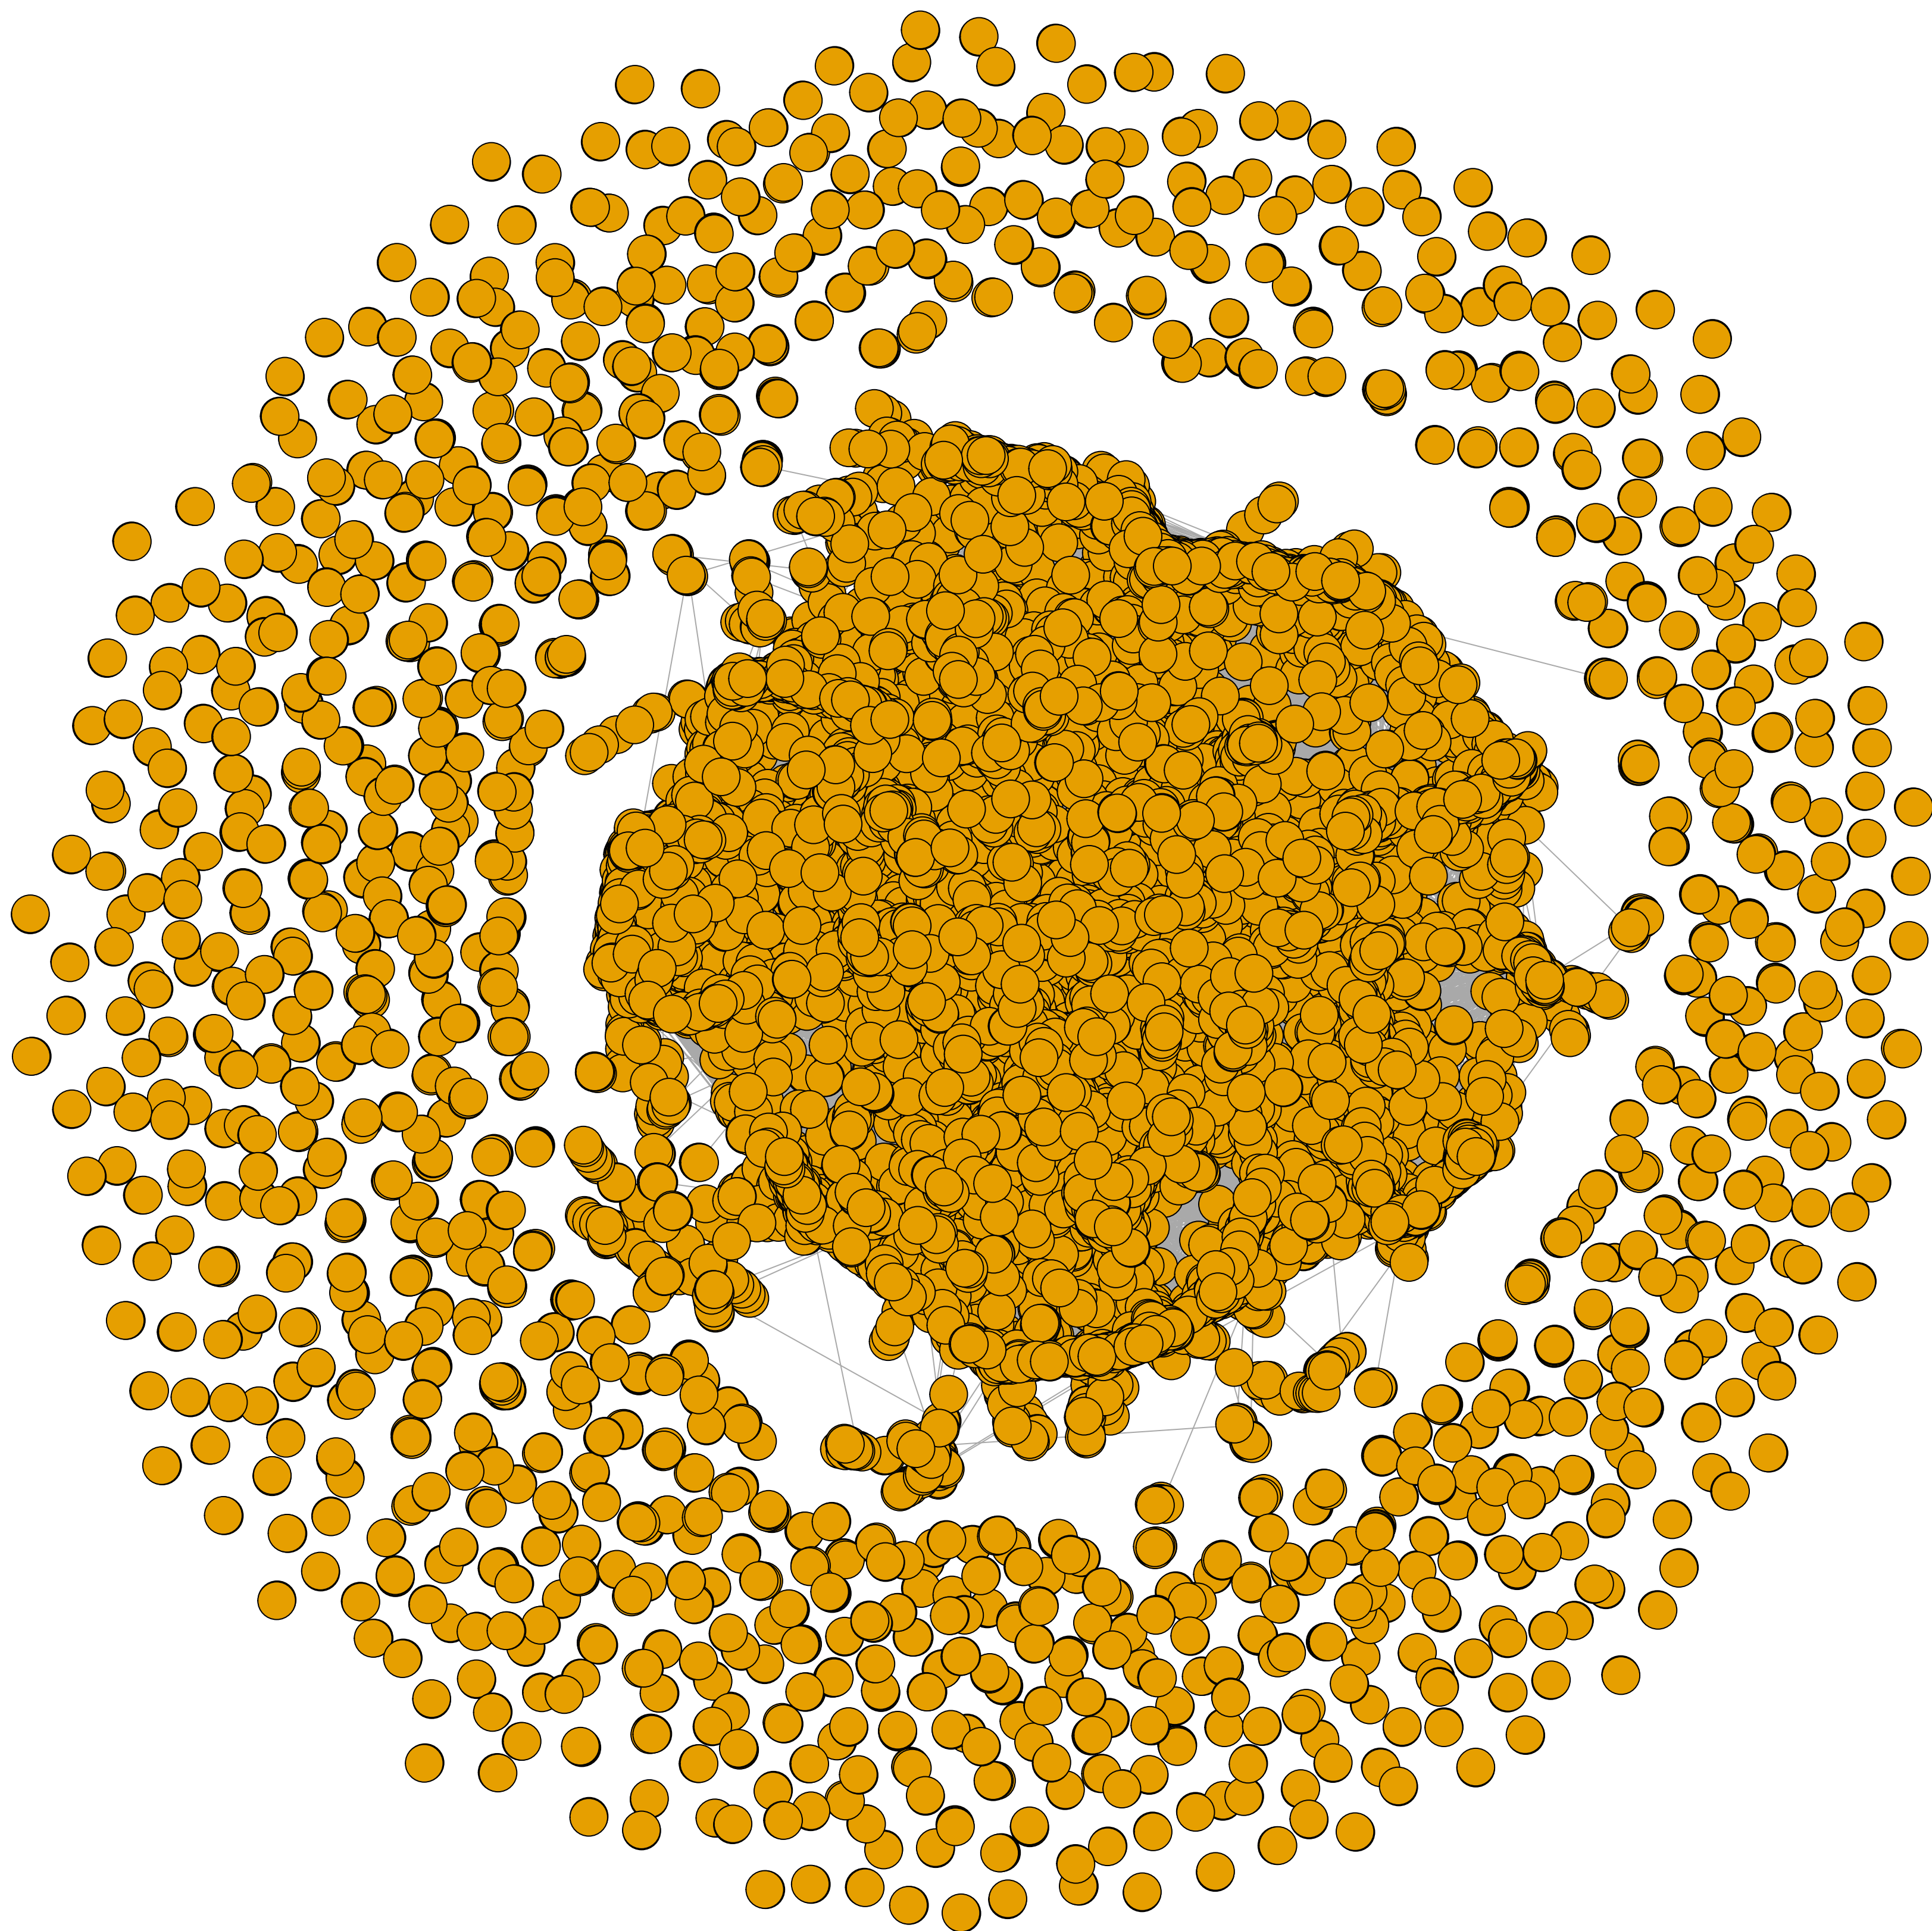

Supplement: Supplementary file [file media-2.pdf]
